# Supplementary material for: Hypertension, BMI, and cardiovascular and cerebrovascular diseases
Source: publisher site journal article supplement (doi:10.1515/med-2021-0014), 2021-01-01
Supplement: Supplementary file 1 [file med-2021-0014_sm.pdf]

# Supplementary material

5

5

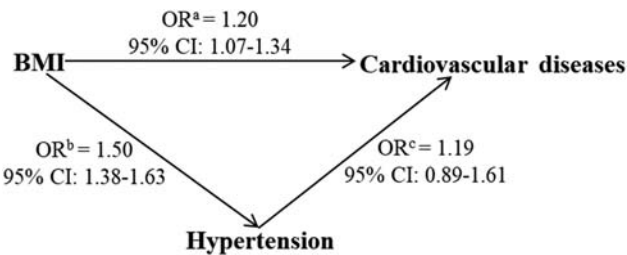

**Figure S1:** Associations between 1-SD increase in BMI, hypertension ( $\geq 130/80$  mm Hg), and cardiovascular diseases. Abbreviations: BMI, body mass index. The values are presented as the odds ratios (ORs) and 95% confidence intervals (95% CIs); <sup>a</sup>adjusted for age, sex, hypertensive status, alcohol use, smoking, and diabetic status; <sup>b</sup>adjusted for age, sex, alcohol use, smoking, and diabetic status; <sup>c</sup>adjusted for BMI, age, sex, alcohol use, smoking, and diabetic status. The statistical analysis was performed with multivariate logistic regression analysis. The significance threshold was  $p < 0.05$ .

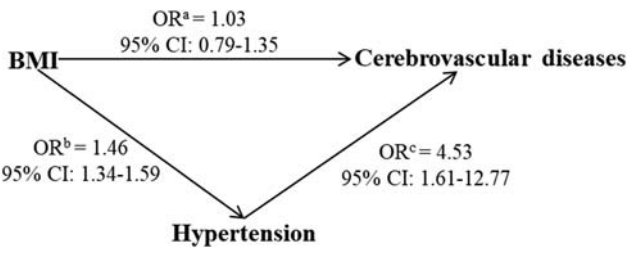

**Figure S2:** Associations between 1-SD increase in BMI, hypertension ( $\geq 130/80$  mm Hg), and cerebrovascular diseases. Abbreviations: BMI, body mass index. The values are presented as the odds ratios (ORs) and 95% confidence intervals (95% CIs); <sup>a</sup>adjusted for age, sex, hypertensive status, alcohol use, smoking, and diabetic status; <sup>b</sup>adjusted for age, sex, alcohol use, smoking, and diabetic status; <sup>c</sup>adjusted for BMI, age, sex, alcohol use, smoking, and diabetic status. The statistical analysis was performed with multivariate logistic regression analysis. The significance threshold was  $p < 0.05$ .

**Table S1:** Classification, number, and percentage of cardiovascular and cerebrovascular diseases (CCDs)

| CCDs classification      | Disease name                   | N (%)      |
|--------------------------|--------------------------------|------------|
| Cardiovascular disease   | Coronary heart disease         | 205 (53.2) |
|                          | Angina                         | 88 (22.9)  |
|                          | Other cardiovascular diseases  | 82 (21.3)  |
| Cerebrovascular disease  | Cerebral hemorrhage            | 10 (2.6)   |
|                          | Cerebral thrombosis            | 62 (16.1)  |
|                          | Other cerebrovascular diseases | 9 (2.3)    |
| Total number of diseases |                                | 456        |
| Total individuals        |                                | 385        |

Abbreviations: CCDs, cardiovascular and cerebrovascular diseases; BMI, body mass index.

**Table S2:** Odds ratios (ORs) and 95% confidence intervals (95% CIs) for body mass index (per 1-SD increase) and cardiovascular and cerebrovascular diseases (CCDs)

| Dependent variable      | Unadjusted |           | Adjusted <sup>a</sup> |           |
|-------------------------|------------|-----------|-----------------------|-----------|
|                         | OR         | 95% CI    | OR                    | 95% CI    |
| Cardiovascular disease  | 1.29       | 1.17–1.41 | 1.20                  | 1.07–1.34 |
| Cerebrovascular disease | 1.16       | 0.92–1.46 | 1.03                  | 0.79–1.35 |
| CCDs                    | 1.29       | 1.18–1.41 | 1.19                  | 1.07–1.31 |

Abbreviations: CCDs, cardiovascular and cerebrovascular diseases; BMI, body mass index. The values are presented as the odds ratios (ORs) and 95% confidence intervals (95% CIs); ORs were obtained after adjusting for age, sex, hypertensive status, alcohol use, smoking, and diabetic status.

**Table S3:** Adjusted<sup>a</sup> odds ratios (ORs) and 95% confidence intervals (95% CIs) for associations between hypertension and CCDs by body mass index (BMI)

| Variable | Subgroup                    | n     | Hypertension ( $\geq 130/80$ mm Hg) |            | Hypertension ( $\geq 140/90$ mm Hg) |           |
|----------|-----------------------------|-------|-------------------------------------|------------|-------------------------------------|-----------|
|          |                             |       | OR                                  | 95% CI     | OR                                  | 95% CI    |
| BMI      | <28 kg/m <sup>2</sup>       | 3,576 | 1.39                                | 1.04–1.85  | 2.23                                | 1.73–2.86 |
|          | $\geq 28$ kg/m <sup>2</sup> | 366   | 5.90                                | 1.34–25.98 | 2.69                                | 1.39–5.20 |

Abbreviations: CCDs, cardiovascular and cerebrovascular diseases; BMI, body mass index. The values are presented as the odds ratios (ORs) and 95% confidence intervals (95% CIs); ORs were obtained after adjusting for age, sex, alcohol use, smoking, and diabetic status.
